# Supplementary material for: Threats to Neglected Biodiversity: Conservation Success Requires More Than Charisma
Source: Frontiers journal article supplement (doi:10.3389/fcosc.2021.727517), 2022-01-14
Supplement: Data_Sheet_2.docx [file Data_Sheet_2.docx]

Appendix 2. AICc output for each model for each threat-phylum combination. For each model, we provide degrees of freedom (df), log likelihood (logLik), AIC value adjusted for small sample sizes (AICc), the difference between the AICc of a given model and the model with the smallest AICc value (ΔAICc), and the AICc weight (ω).

| **Threat** | **Phylum** | **Model form** | **df** | **logLik** | **AICc** | **ΔAICc** | **ω** |
| --- | --- | --- | --- | --- | --- | --- | --- |
| Aquatic development | Angiosperms | Quadratic | 3 | -369.43 | 744.89 | 0.00 | 0.95 |
| Aquatic development | Angiosperms | Log-based pseudo-threshold | 2 | -373.57 | 751.16 | 6.27 | 0.04 |
| Aquatic development | Angiosperms | Linear | 2 | -375.52 | 755.06 | 10.17 | 0.01 |
| Aquatic development | Angiosperms | Null | 1 | -376.77 | 755.55 | 10.66 | 0.00 |
| Aquatic development | Arthropods | Linear | 2 | -69.41 | 142.91 | 0.00 | 0.45 |
| Aquatic development | Arthropods | Log-based pseudo-threshold | 2 | -69.57 | 143.24 | 0.33 | 0.38 |
| Aquatic development | Arthropods | Quadratic | 3 | -69.38 | 144.94 | 2.03 | 0.16 |
| Aquatic development | Arthropods | Null | 1 | -78.69 | 159.42 | 16.50 | 0.00 |
| Aquatic development | Mollusks | Quadratic | 3 | -50.23 | 106.67 | 0.00 | 0.99 |
| Aquatic development | Mollusks | Log-based pseudo-threshold | 2 | -55.67 | 115.43 | 8.77 | 0.01 |
| Aquatic development | Mollusks | Linear | 2 | -59.58 | 123.26 | 16.59 | 0.00 |
| Aquatic development | Mollusks | Null | 1 | -63.68 | 129.39 | 22.72 | 0.00 |
| Aquatic development | Chordates | Quadratic | 3 | -224.58 | 455.24 | 0.00 | 1.00 |
| Aquatic development | Chordates | Log-based pseudo-threshold | 2 | -231.75 | 467.53 | 12.30 | 0.00 |
| Aquatic development | Chordates | Linear | 2 | -235.97 | 475.97 | 20.73 | 0.00 |
| Aquatic development | Chordates | Null | 1 | -240.31 | 482.63 | 27.40 | 0.00 |
| Development | Angiosperms | Quadratic | 3 | -614.00 | 1234.03 | 0.00 | 0.98 |
| Development | Angiosperms | Log-based pseudo-threshold | 2 | -618.77 | 1241.56 | 7.54 | 0.02 |
| Development | Angiosperms | Linear | 2 | -622.80 | 1249.62 | 15.60 | 0.00 |
| Development | Angiosperms | Null | 1 | -625.90 | 1253.81 | 19.78 | 0.00 |
| Development | Arthropods | Null | 1 | -82.37 | 166.77 | 0.00 | 0.48 |
| Development | Arthropods | Linear | 2 | -82.03 | 168.15 | 1.38 | 0.24 |
| Development | Arthropods | Log-based pseudo-threshold | 2 | -82.26 | 168.61 | 1.84 | 0.19 |
| Development | Arthropods | Quadratic | 3 | -81.99 | 170.17 | 3.41 | 0.09 |
| Development | Mollusks | Linear | 2 | -77.11 | 158.32 | 0.00 | 0.58 |
| Development | Mollusks | Log-based pseudo-threshold | 2 | -78.09 | 160.28 | 1.97 | 0.22 |
| Development | Mollusks | Quadratic | 3 | -77.09 | 160.38 | 2.06 | 0.21 |
| Development | Mollusks | Null | 1 | -85.95 | 173.93 | 15.62 | 0.00 |
| Development | Chordates | Linear | 2 | -227.36 | 458.75 | 0.00 | 0.71 |
| Development | Chordates | Quadratic | 3 | -227.26 | 460.60 | 1.85 | 0.28 |
| Development | Chordates | Log-based pseudo-threshold | 2 | -231.78 | 467.60 | 8.85 | 0.01 |
| Development | Chordates | Null | 1 | -242.60 | 487.20 | 28.45 | 0.00 |
| Mining & oil/gas | Angiosperms | Quadratic | 3 | -309.06 | 624.16 | 0.00 | 0.98 |
| Mining & oil/gas | Angiosperms | Linear | 2 | -313.96 | 631.93 | 7.78 | 0.02 |
| Mining & oil/gas | Angiosperms | Log-based pseudo-threshold | 2 | -316.09 | 636.19 | 12.03 | 0.00 |
| Mining & oil/gas | Angiosperms | Null | 1 | -317.21 | 636.42 | 12.26 | 0.00 |
| Mining & oil/gas | Arthropods | Log-based pseudo-threshold | 2 | -39.48 | 83.06 | 0.00 | 0.44 |
| Mining & oil/gas | Arthropods | Quadratic | 3 | -39.03 | 84.25 | 1.19 | 0.24 |
| Mining & oil/gas | Arthropods | Linear | 2 | -40.17 | 84.44 | 1.38 | 0.22 |
| Mining & oil/gas | Arthropods | Null | 1 | -42.05 | 86.13 | 3.07 | 0.10 |
| Mining & oil/gas | Mollusks | Log-based pseudo-threshold | 2 | -81.10 | 166.30 | 0.00 | 0.37 |
| Mining & oil/gas | Mollusks | Quadratic | 3 | -80.12 | 166.45 | 0.15 | 0.34 |
| Mining & oil/gas | Mollusks | Linear | 2 | -81.93 | 167.95 | 1.65 | 0.16 |
| Mining & oil/gas | Mollusks | Null | 1 | -83.20 | 168.44 | 2.14 | 0.13 |
| Mining & oil/gas | Chordates | Quadratic | 3 | -170.13 | 346.34 | 0.00 | 0.91 |
| Mining & oil/gas | Chordates | Log-based pseudo-threshold | 2 | -173.99 | 352.01 | 5.67 | 0.05 |
| Mining & oil/gas | Chordates | Linear | 2 | -174.32 | 352.68 | 6.35 | 0.04 |
| Mining & oil/gas | Chordates | Null | 1 | -188.14 | 378.29 | 31.96 | 0.00 |
| Harvested renewable resources | Angiosperms | Log-based pseudo-threshold | 2 | -562.98 | 1129.98 | 0.00 | 0.98 |
| Harvested renewable resources | Angiosperms | Quadratic | 3 | -566.05 | 1138.12 | 8.14 | 0.02 |
| Harvested renewable resources | Angiosperms | Linear | 2 | -574.37 | 1152.75 | 22.77 | 0.00 |
| Harvested renewable resources | Angiosperms | Null | 1 | -630.73 | 1263.46 | 133.49 | 0.00 |
| Harvested renewable resources | Arthropods | Linear | 2 | -74.46 | 153.02 | 0.00 | 0.59 |
| Harvested renewable resources | Arthropods | Quadratic | 3 | -74.46 | 155.11 | 2.09 | 0.21 |
| Harvested renewable resources | Arthropods | Log-based pseudo-threshold | 2 | -75.56 | 155.21 | 2.18 | 0.20 |
| Harvested renewable resources | Arthropods | Null | 1 | -84.15 | 170.34 | 17.31 | 0.00 |
| Harvested renewable resources | Mollusks | Linear | 2 | -79.38 | 162.85 | 0.00 | 0.52 |
| Harvested renewable resources | Mollusks | Log-based pseudo-threshold | 2 | -79.97 | 164.04 | 1.19 | 0.28 |
| Harvested renewable resources | Mollusks | Quadratic | 3 | -79.29 | 164.78 | 1.93 | 0.20 |
| Harvested renewable resources | Mollusks | Null | 1 | -85.16 | 172.35 | 9.50 | 0.00 |
| Harvested renewable resources | Chordates | Quadratic | 3 | -211.04 | 428.14 | 0.00 | 0.98 |
| Harvested renewable resources | Chordates | Log-based pseudo-threshold | 2 | -215.96 | 435.96 | 7.82 | 0.02 |
| Harvested renewable resources | Chordates | Linear | 2 | -218.67 | 441.37 | 13.23 | 0.00 |
| Harvested renewable resources | Chordates | Null | 1 | -233.38 | 468.77 | 40.62 | 0.00 |
| Non-developmental habitat alteration | Angiosperms | Quadratic | 3 | -474.92 | 955.87 | 0.00 | 1.00 |
| Non-developmental habitat alteration | Angiosperms | Log-based pseudo-threshold | 2 | -491.23 | 986.46 | 30.60 | 0.00 |
| Non-developmental habitat alteration | Angiosperms | Null | 1 | -493.98 | 989.97 | 34.10 | 0.00 |
| Non-developmental habitat alteration | Angiosperms | Linear | 2 | -493.81 | 991.63 | 35.76 | 0.00 |
| Non-developmental habitat alteration | Arthropods | Linear | 2 | -62.28 | 128.65 | 0.00 | 0.57 |
| Non-developmental habitat alteration | Arthropods | Quadratic | 3 | -62.11 | 130.41 | 1.77 | 0.23 |
| Non-developmental habitat alteration | Arthropods | Log-based pseudo-threshold | 2 | -63.39 | 130.88 | 2.23 | 0.19 |
| Non-developmental habitat alteration | Arthropods | Null | 1 | -67.24 | 136.51 | 7.87 | 0.01 |
| Non-developmental habitat alteration | Mollusks | Quadratic | 3 | -80.02 | 166.24 | 0.00 | 0.87 |
| Non-developmental habitat alteration | Mollusks | Log-based pseudo-threshold | 2 | -83.56 | 171.23 | 4.99 | 0.07 |
| Non-developmental habitat alteration | Mollusks | Null | 1 | -85.16 | 172.35 | 6.11 | 0.04 |
| Non-developmental habitat alteration | Mollusks | Linear | 2 | -84.86 | 173.83 | 7.59 | 0.02 |
| Non-developmental habitat alteration | Chordates | Log-based pseudo-threshold | 2 | -175.58 | 355.19 | 0.00 | 0.63 |
| Non-developmental habitat alteration | Chordates | Quadratic | 3 | -175.11 | 356.28 | 1.09 | 0.37 |
| Non-developmental habitat alteration | Chordates | Linear | 2 | -181.97 | 367.97 | 12.77 | 0.00 |
| Non-developmental habitat alteration | Chordates | Null | 1 | -216.28 | 434.58 | 79.39 | 0.00 |
| Anthropogenic ecosystem modification | Angiosperms | Quadratic | 3 | -141.94 | 289.91 | 0.00 | 1.00 |
| Anthropogenic ecosystem modification | Angiosperms | Linear | 2 | -148.93 | 301.88 | 11.96 | 0.00 |
| Anthropogenic ecosystem modification | Angiosperms | Log-based pseudo-threshold | 2 | -158.54 | 321.10 | 31.19 | 0.00 |
| Anthropogenic ecosystem modification | Angiosperms | Null | 1 | -263.81 | 529.62 | 239.71 | 0.00 |
| Anthropogenic ecosystem modification | Chordates | Linear | 2 | -38.82 | 81.68 | 0.00 | 0.50 |
| Anthropogenic ecosystem modification | Chordates | Log-based pseudo-threshold | 2 | -39.27 | 82.58 | 0.90 | 0.32 |
| Anthropogenic ecosystem modification | Chordates | Quadratic | 3 | -38.82 | 83.71 | 2.03 | 0.18 |
| Anthropogenic ecosystem modification | Chordates | Null | 1 | -45.41 | 92.83 | 11.15 | 0.00 |
| Human disturbances | Angiosperms | Quadratic | 3 | -595.38 | 1196.79 | 0.00 | 1.00 |
| Human disturbances | Angiosperms | Log-based pseudo-threshold | 2 | -622.02 | 1248.06 | 51.27 | 0.00 |
| Human disturbances | Angiosperms | Null | 1 | -627.06 | 1256.13 | 59.35 | 0.00 |
| Human disturbances | Angiosperms | Linear | 2 | -626.52 | 1257.05 | 60.26 | 0.00 |
| Human disturbances | Arthropods | Quadratic | 3 | -80.99 | 168.18 | 0.00 | 0.88 |
| Human disturbances | Arthropods | Log-based pseudo-threshold | 2 | -84.78 | 173.67 | 5.48 | 0.06 |
| Human disturbances | Arthropods | Null | 1 | -86.06 | 174.16 | 5.98 | 0.04 |
| Human disturbances | Arthropods | Linear | 2 | -85.94 | 175.98 | 7.80 | 0.02 |
| Human disturbances | Mollusks | Quadratic | 3 | -59.47 | 125.13 | 0.00 | 0.92 |
| Human disturbances | Mollusks | Linear | 2 | -63.73 | 131.56 | 6.43 | 0.04 |
| Human disturbances | Mollusks | Null | 1 | -64.98 | 131.99 | 6.86 | 0.03 |
| Human disturbances | Mollusks | Log-based pseudo-threshold | 2 | -64.87 | 133.83 | 8.70 | 0.01 |
| Human disturbances | Chordates | Linear | 2 | -173.22 | 350.48 | 0.00 | 0.67 |
| Human disturbances | Chordates | Quadratic | 3 | -173.20 | 352.46 | 1.99 | 0.25 |
| Human disturbances | Chordates | Log-based pseudo-threshold | 2 | -175.41 | 354.85 | 4.38 | 0.08 |
| Human disturbances | Chordates | Null | 1 | -181.85 | 365.72 | 15.24 | 0.00 |
| Authorized take | Angiosperms | Linear | 2 | -310.40 | 624.82 | 0.00 | 0.40 |
| Authorized take | Angiosperms | Log-based pseudo-threshold | 2 | -310.43 | 624.87 | 0.05 | 0.39 |
| Authorized take | Angiosperms | Quadratic | 3 | -310.04 | 626.11 | 1.29 | 0.21 |
| Authorized take | Angiosperms | Null | 1 | -325.44 | 652.89 | 28.07 | 0.00 |
| Authorized take | Arthropods | Null | 1 | -37.51 | 77.05 | 0.00 | 0.44 |
| Authorized take | Arthropods | Log-based pseudo-threshold | 2 | -37.06 | 78.21 | 1.16 | 0.25 |
| Authorized take | Arthropods | Linear | 2 | -37.12 | 78.34 | 1.29 | 0.23 |
| Authorized take | Arthropods | Quadratic | 3 | -37.11 | 80.42 | 3.37 | 0.08 |
| Authorized take | Mollusks | Null | 1 | -82.76 | 167.56 | 0.00 | 0.39 |
| Authorized take | Mollusks | Quadratic | 3 | -81.14 | 168.49 | 0.93 | 0.24 |
| Authorized take | Mollusks | Linear | 2 | -82.29 | 168.68 | 1.13 | 0.22 |
| Authorized take | Mollusks | Log-based pseudo-threshold | 2 | -82.74 | 169.57 | 2.02 | 0.14 |
| Authorized take | Chordates | Linear | 2 | -150.67 | 305.38 | 0.00 | 0.55 |
| Authorized take | Chordates | Quadratic | 3 | -150.20 | 306.46 | 1.09 | 0.32 |
| Authorized take | Chordates | Log-based pseudo-threshold | 2 | -152.66 | 309.36 | 3.99 | 0.07 |
| Authorized take | Chordates | Null | 1 | -153.88 | 309.78 | 4.40 | 0.06 |
| Unauthorized take | Angiosperms | Null | 1 | -176.21 | 354.42 | 0.00 | 0.34 |
| Unauthorized take | Angiosperms | Linear | 2 | -175.35 | 354.72 | 0.30 | 0.30 |
| Unauthorized take | Angiosperms | Quadratic | 3 | -174.71 | 355.44 | 1.03 | 0.21 |
| Unauthorized take | Angiosperms | Log-based pseudo-threshold | 2 | -176.00 | 356.02 | 1.61 | 0.15 |
| Unauthorized take | Mollusks | Quadratic | 3 | -49.50 | 105.20 | 0.00 | 1.00 |
| Unauthorized take | Mollusks | Null | 1 | -59.47 | 120.98 | 15.78 | 0.00 |
| Unauthorized take | Mollusks | Log-based pseudo-threshold | 2 | -59.30 | 122.70 | 17.50 | 0.00 |
| Unauthorized take | Mollusks | Linear | 2 | -59.34 | 122.78 | 17.58 | 0.00 |
| Unauthorized take | Chordates | Linear | 2 | -131.21 | 266.45 | 0.00 | 0.58 |
| Unauthorized take | Chordates | Quadratic | 3 | -130.61 | 267.30 | 0.85 | 0.38 |
| Unauthorized take | Chordates | Log-based pseudo-threshold | 2 | -134.07 | 272.17 | 5.72 | 0.03 |
| Unauthorized take | Chordates | Null | 1 | -136.18 | 274.38 | 7.93 | 0.01 |
| Unintentional take | Chordates | Quadratic | 3 | -150.66 | 307.39 | 0.00 | 0.51 |
| Unintentional take | Chordates | Linear | 2 | -151.72 | 307.47 | 0.08 | 0.49 |
| Unintentional take | Chordates | Log-based pseudo-threshold | 2 | -158.41 | 320.84 | 13.46 | 0.00 |
| Unintentional take | Chordates | Null | 1 | -170.90 | 343.81 | 36.43 | 0.00 |
| Sedimentation | Angiosperms | Quadratic | 3 | -428.52 | 863.07 | 0.00 | 0.92 |
| Sedimentation | Angiosperms | Linear | 2 | -432.35 | 868.70 | 5.63 | 0.05 |
| Sedimentation | Angiosperms | Log-based pseudo-threshold | 2 | -433.10 | 870.21 | 7.13 | 0.03 |
| Sedimentation | Angiosperms | Null | 1 | -595.41 | 1192.83 | 329.76 | 0.00 |
| Sedimentation | Arthropods | Linear | 2 | -57.10 | 118.31 | 0.00 | 0.53 |
| Sedimentation | Arthropods | Quadratic | 3 | -56.33 | 118.85 | 0.55 | 0.40 |
| Sedimentation | Arthropods | Log-based pseudo-threshold | 2 | -59.14 | 122.37 | 4.07 | 0.07 |
| Sedimentation | Arthropods | Null | 1 | -70.86 | 143.75 | 25.45 | 0.00 |
| Sedimentation | Mollusks | Quadratic | 3 | -66.90 | 140.00 | 0.00 | 0.81 |
| Sedimentation | Mollusks | Log-based pseudo-threshold | 2 | -69.40 | 142.90 | 2.90 | 0.19 |
| Sedimentation | Mollusks | Linear | 2 | -73.06 | 150.21 | 10.21 | 0.00 |
| Sedimentation | Mollusks | Null | 1 | -77.97 | 157.98 | 17.97 | 0.00 |
| Sedimentation | Chordates | Quadratic | 3 | -194.41 | 394.90 | 0.00 | 0.97 |
| Sedimentation | Chordates | Log-based pseudo-threshold | 2 | -199.41 | 402.85 | 7.95 | 0.02 |
| Sedimentation | Chordates | Linear | 2 | -200.24 | 404.51 | 9.61 | 0.01 |
| Sedimentation | Chordates | Null | 1 | -211.20 | 424.41 | 29.51 | 0.00 |
| Pesticide pollution | Angiosperms | Log-based pseudo-threshold | 2 | -199.45 | 402.92 | 0.00 | 0.51 |
| Pesticide pollution | Angiosperms | Quadratic | 3 | -198.80 | 403.63 | 0.71 | 0.36 |
| Pesticide pollution | Angiosperms | Linear | 2 | -200.84 | 405.70 | 2.77 | 0.13 |
| Pesticide pollution | Angiosperms | Null | 1 | -204.89 | 411.78 | 8.85 | 0.01 |
| Pesticide pollution | Arthropods | Quadratic | 3 | -61.18 | 128.56 | 0.00 | 1.00 |
| Pesticide pollution | Arthropods | Log-based pseudo-threshold | 2 | -67.93 | 139.96 | 11.40 | 0.00 |
| Pesticide pollution | Arthropods | Linear | 2 | -70.17 | 144.44 | 15.89 | 0.00 |
| Pesticide pollution | Arthropods | Null | 1 | -71.98 | 145.99 | 17.43 | 0.00 |
| Pesticide pollution | Mollusks | Log-based pseudo-threshold | 2 | -80.63 | 165.35 | 0.00 | 0.44 |
| Pesticide pollution | Mollusks | Linear | 2 | -80.83 | 165.76 | 0.41 | 0.36 |
| Pesticide pollution | Mollusks | Quadratic | 3 | -80.45 | 167.11 | 1.76 | 0.18 |
| Pesticide pollution | Mollusks | Null | 1 | -84.92 | 171.86 | 6.51 | 0.02 |
| Pesticide pollution | Chordates | Linear | 2 | -111.55 | 227.14 | 0.00 | 0.42 |
| Pesticide pollution | Chordates | Log-based pseudo-threshold | 2 | -111.65 | 227.33 | 0.19 | 0.38 |
| Pesticide pollution | Chordates | Quadratic | 3 | -111.29 | 228.66 | 1.52 | 0.20 |
| Pesticide pollution | Chordates | Null | 1 | -120.23 | 242.47 | 15.34 | 0.00 |
| Chemical pollution | Angiosperms | Quadratic | 3 | -61.53 | 129.09 | 0.00 | 0.43 |
| Chemical pollution | Angiosperms | Null | 1 | -63.86 | 129.73 | 0.64 | 0.32 |
| Chemical pollution | Angiosperms | Linear | 2 | -63.73 | 131.46 | 2.37 | 0.13 |
| Chemical pollution | Angiosperms | Log-based pseudo-threshold | 2 | -63.86 | 131.74 | 2.64 | 0.12 |
| Chemical pollution | Arthropods | Null | 1 | -46.24 | 94.52 | 0.00 | 0.44 |
| Chemical pollution | Arthropods | Log-based pseudo-threshold | 2 | -45.79 | 95.68 | 1.16 | 0.25 |
| Chemical pollution | Arthropods | Linear | 2 | -46.13 | 96.36 | 1.84 | 0.18 |
| Chemical pollution | Arthropods | Quadratic | 3 | -45.35 | 96.89 | 2.37 | 0.14 |
| Chemical pollution | Mollusks | Quadratic | 3 | -71.83 | 149.86 | 0.00 | 1.00 |
| Chemical pollution | Mollusks | Log-based pseudo-threshold | 2 | -80.02 | 164.14 | 14.28 | 0.00 |
| Chemical pollution | Mollusks | Linear | 2 | -82.40 | 168.91 | 19.04 | 0.00 |
| Chemical pollution | Mollusks | Null | 1 | -84.33 | 170.69 | 20.83 | 0.00 |
| Chemical pollution | Chordates | Quadratic | 3 | -151.31 | 308.69 | 0.00 | 0.37 |
| Chemical pollution | Chordates | Linear | 2 | -152.34 | 308.71 | 0.02 | 0.37 |
| Chemical pollution | Chordates | Log-based pseudo-threshold | 2 | -152.69 | 309.41 | 0.72 | 0.26 |
| Chemical pollution | Chordates | Null | 1 | -167.98 | 337.98 | 29.29 | 0.00 |
| Nutrient pollution | Angiosperms | Quadratic | 3 | -52.81 | 111.64 | 0.00 | 0.40 |
| Nutrient pollution | Angiosperms | Null | 1 | -55.05 | 112.11 | 0.47 | 0.32 |
| Nutrient pollution | Angiosperms | Log-based pseudo-threshold | 2 | -54.74 | 113.50 | 1.86 | 0.16 |
| Nutrient pollution | Angiosperms | Linear | 2 | -55.00 | 114.01 | 2.37 | 0.12 |
| Nutrient pollution | Arthropods | Null | 1 | -46.24 | 94.52 | 0.00 | 0.45 |
| Nutrient pollution | Arthropods | Log-based pseudo-threshold | 2 | -45.75 | 95.59 | 1.07 | 0.26 |
| Nutrient pollution | Arthropods | Linear | 2 | -46.07 | 96.25 | 1.73 | 0.19 |
| Nutrient pollution | Arthropods | Quadratic | 3 | -45.71 | 97.62 | 3.10 | 0.10 |
| Nutrient pollution | Mollusks | Quadratic | 3 | -73.88 | 153.95 | 0.00 | 1.00 |
| Nutrient pollution | Mollusks | Log-based pseudo-threshold | 2 | -80.80 | 165.70 | 11.75 | 0.00 |
| Nutrient pollution | Mollusks | Null | 1 | -84.33 | 170.69 | 16.74 | 0.00 |
| Nutrient pollution | Mollusks | Linear | 2 | -83.36 | 170.83 | 16.88 | 0.00 |
| Nutrient pollution | Chordates | Linear | 2 | -138.84 | 281.72 | 0.00 | 0.52 |
| Nutrient pollution | Chordates | Quadratic | 3 | -138.60 | 283.27 | 1.55 | 0.24 |
| Nutrient pollution | Chordates | Log-based pseudo-threshold | 2 | -139.65 | 283.33 | 1.61 | 0.23 |
| Nutrient pollution | Chordates | Null | 1 | -148.81 | 299.64 | 17.92 | 0.00 |
| Nonpoint pollution | Arthropods | Null | 1 | -55.48 | 112.98 | 0.00 | 0.34 |
| Nonpoint pollution | Arthropods | Quadratic | 3 | -53.48 | 113.14 | 0.16 | 0.31 |
| Nonpoint pollution | Arthropods | Log-based pseudo-threshold | 2 | -54.86 | 113.82 | 0.84 | 0.22 |
| Nonpoint pollution | Arthropods | Linear | 2 | -55.37 | 114.83 | 1.84 | 0.13 |
| Nonpoint pollution | Mollusks | Quadratic | 3 | -74.01 | 154.21 | 0.00 | 1.00 |
| Nonpoint pollution | Mollusks | Log-based pseudo-threshold | 2 | -80.45 | 165.01 | 10.79 | 0.00 |
| Nonpoint pollution | Mollusks | Linear | 2 | -83.36 | 170.82 | 16.61 | 0.00 |
| Nonpoint pollution | Mollusks | Null | 1 | -84.92 | 171.86 | 17.65 | 0.00 |
| Nonpoint pollution | Chordates | Quadratic | 3 | -158.98 | 324.04 | 0.00 | 0.99 |
| Nonpoint pollution | Chordates | Log-based pseudo-threshold | 2 | -165.00 | 334.04 | 10.00 | 0.01 |
| Nonpoint pollution | Chordates | Linear | 2 | -168.53 | 341.09 | 17.05 | 0.00 |
| Nonpoint pollution | Chordates | Null | 1 | -179.22 | 360.45 | 36.42 | 0.00 |
| Object pollution | Angiosperms | Null | 1 | -259.02 | 520.04 | 0.00 | 0.42 |
| Object pollution | Angiosperms | Log-based pseudo-threshold | 2 | -258.43 | 520.88 | 0.84 | 0.28 |
| Object pollution | Angiosperms | Linear | 2 | -258.70 | 521.40 | 1.36 | 0.21 |
| Object pollution | Angiosperms | Quadratic | 3 | -258.61 | 523.25 | 3.21 | 0.08 |
| Object pollution | Arthropods | Quadratic | 3 | -51.42 | 109.04 | 0.00 | 0.99 |
| Object pollution | Arthropods | Null | 1 | -58.73 | 119.50 | 10.46 | 0.01 |
| Object pollution | Arthropods | Log-based pseudo-threshold | 2 | -58.15 | 120.40 | 11.37 | 0.00 |
| Object pollution | Arthropods | Linear | 2 | -58.73 | 121.56 | 12.52 | 0.00 |
| Object pollution | Chordates | Linear | 2 | -59.34 | 122.72 | 0.00 | 0.54 |
| Object pollution | Chordates | Log-based pseudo-threshold | 2 | -60.07 | 124.17 | 1.45 | 0.26 |
| Object pollution | Chordates | Quadratic | 3 | -59.32 | 124.71 | 1.99 | 0.20 |
| Object pollution | Chordates | Null | 1 | -73.83 | 149.67 | 26.95 | 0.00 |
| Direct species interactions | Angiosperms | Linear | 2 | -414.14 | 832.30 | 0.00 | 0.57 |
| Direct species interactions | Angiosperms | Quadratic | 3 | -413.40 | 832.83 | 0.53 | 0.43 |
| Direct species interactions | Angiosperms | Log-based pseudo-threshold | 2 | -433.50 | 871.01 | 38.71 | 0.00 |
| Direct species interactions | Angiosperms | Null | 1 | -539.78 | 1081.56 | 249.26 | 0.00 |
| Direct species interactions | Arthropods | Log-based pseudo-threshold | 2 | -68.40 | 140.90 | 0.00 | 0.70 |
| Direct species interactions | Arthropods | Quadratic | 3 | -68.66 | 143.52 | 2.62 | 0.19 |
| Direct species interactions | Arthropods | Linear | 2 | -70.28 | 144.66 | 3.76 | 0.11 |
| Direct species interactions | Arthropods | Null | 1 | -88.16 | 178.35 | 37.45 | 0.00 |
| Direct species interactions | Mollusks | Quadratic | 3 | -54.71 | 115.63 | 0.00 | 0.99 |
| Direct species interactions | Mollusks | Linear | 2 | -60.40 | 124.91 | 9.28 | 0.01 |
| Direct species interactions | Mollusks | Log-based pseudo-threshold | 2 | -68.74 | 141.58 | 25.95 | 0.00 |
| Direct species interactions | Mollusks | Null | 1 | -85.37 | 172.77 | 57.14 | 0.00 |
| Direct species interactions | Chordates | Quadratic | 3 | -233.35 | 472.76 | 0.00 | 0.83 |
| Direct species interactions | Chordates | Log-based pseudo-threshold | 2 | -236.16 | 476.35 | 3.59 | 0.14 |
| Direct species interactions | Chordates | Linear | 2 | -237.65 | 479.33 | 6.57 | 0.03 |
| Direct species interactions | Chordates | Null | 1 | -240.31 | 482.63 | 9.87 | 0.01 |
| Indirect species interactions | Angiosperms | Linear | 2 | -490.72 | 985.45 | 0.00 | 0.72 |
| Indirect species interactions | Angiosperms | Quadratic | 3 | -490.66 | 987.36 | 1.91 | 0.28 |
| Indirect species interactions | Angiosperms | Log-based pseudo-threshold | 2 | -499.59 | 1003.20 | 17.75 | 0.00 |
| Indirect species interactions | Angiosperms | Null | 1 | -628.65 | 1259.30 | 273.86 | 0.00 |
| Indirect species interactions | Arthropods | Quadratic | 3 | -53.38 | 112.96 | 0.00 | 0.99 |
| Indirect species interactions | Arthropods | Log-based pseudo-threshold | 2 | -58.79 | 121.67 | 8.71 | 0.01 |
| Indirect species interactions | Arthropods | Linear | 2 | -62.58 | 129.26 | 16.30 | 0.00 |
| Indirect species interactions | Arthropods | Null | 1 | -88.47 | 178.98 | 66.02 | 0.00 |
| Indirect species interactions | Mollusks | Linear | 2 | -50.02 | 104.15 | 0.00 | 0.68 |
| Indirect species interactions | Mollusks | Quadratic | 3 | -49.97 | 106.13 | 1.99 | 0.25 |
| Indirect species interactions | Mollusks | Log-based pseudo-threshold | 2 | -52.25 | 108.59 | 4.45 | 0.07 |
| Indirect species interactions | Mollusks | Null | 1 | -80.03 | 162.10 | 57.95 | 0.00 |
| Indirect species interactions | Chordates | Linear | 2 | -207.36 | 418.76 | 0.00 | 0.60 |
| Indirect species interactions | Chordates | Quadratic | 3 | -206.79 | 419.66 | 0.90 | 0.38 |
| Indirect species interactions | Chordates | Log-based pseudo-threshold | 2 | -210.98 | 426.00 | 7.24 | 0.02 |
| Indirect species interactions | Chordates | Null | 1 | -230.37 | 462.75 | 43.98 | 0.00 |
| Severe weather | Angiosperms | Linear | 2 | -390.75 | 785.52 | 0.00 | 0.68 |
| Severe weather | Angiosperms | Quadratic | 3 | -390.50 | 787.04 | 1.52 | 0.32 |
| Severe weather | Angiosperms | Log-based pseudo-threshold | 2 | -401.55 | 807.10 | 21.59 | 0.00 |
| Severe weather | Angiosperms | Null | 1 | -604.40 | 1210.80 | 425.28 | 0.00 |
| Severe weather | Arthropods | Quadratic | 3 | -46.71 | 99.61 | 0.00 | 0.98 |
| Severe weather | Arthropods | Linear | 2 | -51.74 | 107.58 | 7.97 | 0.02 |
| Severe weather | Arthropods | Log-based pseudo-threshold | 2 | -58.60 | 121.30 | 21.69 | 0.00 |
| Severe weather | Arthropods | Null | 1 | -86.06 | 174.16 | 74.55 | 0.00 |
| Severe weather | Mollusks | Log-based pseudo-threshold | 2 | -45.67 | 95.44 | 0.00 | 0.48 |
| Severe weather | Mollusks | Linear | 2 | -45.96 | 96.01 | 0.57 | 0.36 |
| Severe weather | Mollusks | Quadratic | 3 | -45.70 | 97.61 | 2.16 | 0.16 |
| Severe weather | Mollusks | Null | 1 | -83.20 | 168.44 | 73.00 | 0.00 |
| Severe weather | Chordates | Quadratic | 3 | -171.50 | 349.07 | 0.00 | 0.80 |
| Severe weather | Chordates | Linear | 2 | -174.10 | 352.24 | 3.17 | 0.16 |
| Severe weather | Chordates | Log-based pseudo-threshold | 2 | -175.47 | 354.97 | 5.89 | 0.04 |
| Severe weather | Chordates | Null | 1 | -220.89 | 443.78 | 94.71 | 0.00 |
| Fire | Angiosperms | Quadratic | 3 | -447.56 | 901.15 | 0.00 | 0.51 |
| Fire | Angiosperms | Linear | 2 | -448.60 | 901.22 | 0.07 | 0.49 |
| Fire | Angiosperms | Log-based pseudo-threshold | 2 | -456.09 | 916.18 | 15.03 | 0.00 |
| Fire | Angiosperms | Null | 1 | -548.94 | 1099.88 | 198.73 | 0.00 |
| Fire | Arthropods | Quadratic | 3 | -49.94 | 106.08 | 0.00 | 0.94 |
| Fire | Arthropods | Log-based pseudo-threshold | 2 | -53.93 | 111.96 | 5.88 | 0.05 |
| Fire | Arthropods | Linear | 2 | -55.92 | 115.94 | 9.86 | 0.01 |
| Fire | Arthropods | Null | 1 | -77.85 | 157.73 | 51.65 | 0.00 |
| Fire | Mollusks | Linear | 2 | -30.23 | 64.57 | 0.00 | 0.48 |
| Fire | Mollusks | Quadratic | 3 | -29.43 | 65.06 | 0.49 | 0.38 |
| Fire | Mollusks | Log-based pseudo-threshold | 2 | -31.53 | 67.16 | 2.59 | 0.13 |
| Fire | Mollusks | Null | 1 | -34.76 | 71.56 | 6.99 | 0.01 |
| Fire | Chordates | Linear | 2 | -105.07 | 214.16 | 0.00 | 0.41 |
| Fire | Chordates | Log-based pseudo-threshold | 2 | -105.16 | 214.36 | 0.20 | 0.37 |
| Fire | Chordates | Quadratic | 3 | -104.62 | 215.32 | 1.15 | 0.23 |
| Fire | Chordates | Null | 1 | -118.11 | 238.23 | 24.07 | 0.00 |
| Climate change | Angiosperms | Quadratic | 3 | -53.16 | 112.35 | 0.00 | 0.73 |
| Climate change | Angiosperms | Log-based pseudo-threshold | 2 | -55.31 | 114.64 | 2.29 | 0.23 |
| Climate change | Angiosperms | Linear | 2 | -57.02 | 118.06 | 5.71 | 0.04 |
| Climate change | Angiosperms | Null | 1 | -456.75 | 915.50 | 803.15 | 0.00 |
| Climate change | Arthropods | Quadratic | 3 | -14.25 | 34.69 | 0.00 | 0.93 |
| Climate change | Arthropods | Linear | 2 | -17.94 | 39.97 | 5.28 | 0.07 |
| Climate change | Arthropods | Log-based pseudo-threshold | 2 | -21.04 | 46.18 | 11.49 | 0.00 |
| Climate change | Arthropods | Null | 1 | -76.97 | 155.97 | 121.28 | 0.00 |
| Climate change | Mollusks | Quadratic | 3 | -10.61 | 27.42 | 0.00 | 1.00 |
| Climate change | Mollusks | Log-based pseudo-threshold | 2 | -20.41 | 44.91 | 17.50 | 0.00 |
| Climate change | Mollusks | Linear | 2 | -20.76 | 45.62 | 18.20 | 0.00 |
| Climate change | Mollusks | Null | 1 | -60.92 | 123.88 | 96.47 | 0.00 |
| Climate change | Chordates | Linear | 2 | -75.79 | 155.61 | 0.00 | 0.61 |
| Climate change | Chordates | Quadratic | 3 | -75.79 | 157.64 | 2.03 | 0.22 |
| Climate change | Chordates | Log-based pseudo-threshold | 2 | -77.07 | 158.18 | 2.57 | 0.17 |
| Climate change | Chordates | Null | 1 | -164.99 | 331.99 | 176.38 | 0.00 |
| Few individuals | Angiosperms | Log-based pseudo-threshold | 2 | -430.84 | 865.70 | 0.00 | 0.89 |
| Few individuals | Angiosperms | Quadratic | 3 | -431.91 | 869.84 | 4.14 | 0.11 |
| Few individuals | Angiosperms | Linear | 2 | -439.43 | 882.87 | 17.17 | 0.00 |
| Few individuals | Angiosperms | Null | 1 | -466.24 | 934.48 | 68.78 | 0.00 |
| Few individuals | Arthropods | Linear | 2 | -76.22 | 156.53 | 0.00 | 0.60 |
| Few individuals | Arthropods | Quadratic | 3 | -75.90 | 158.00 | 1.48 | 0.29 |
| Few individuals | Arthropods | Log-based pseudo-threshold | 2 | -77.87 | 159.84 | 3.31 | 0.11 |
| Few individuals | Arthropods | Null | 1 | -88.16 | 178.35 | 21.82 | 0.00 |
| Few individuals | Mollusks | Linear | 2 | -69.20 | 142.50 | 0.00 | 0.59 |
| Few individuals | Mollusks | Quadratic | 3 | -68.94 | 144.07 | 1.57 | 0.27 |
| Few individuals | Mollusks | Log-based pseudo-threshold | 2 | -70.65 | 145.39 | 2.89 | 0.14 |
| Few individuals | Mollusks | Null | 1 | -78.69 | 159.42 | 16.92 | 0.00 |
| Few individuals | Chordates | Linear | 2 | -217.43 | 438.90 | 0.00 | 0.72 |
| Few individuals | Chordates | Quadratic | 3 | -217.38 | 440.83 | 1.93 | 0.27 |
| Few individuals | Chordates | Log-based pseudo-threshold | 2 | -221.74 | 447.51 | 8.61 | 0.01 |
| Few individuals | Chordates | Null | 1 | -239.57 | 481.15 | 42.25 | 0.00 |
| Small range | Angiosperms | Quadratic | 3 | -466.07 | 938.16 | 0.00 | 0.83 |
| Small range | Angiosperms | Linear | 2 | -468.83 | 941.67 | 3.51 | 0.14 |
| Small range | Angiosperms | Log-based pseudo-threshold | 2 | -470.41 | 944.83 | 6.67 | 0.03 |
| Small range | Angiosperms | Null | 1 | -532.05 | 1066.11 | 127.95 | 0.00 |
| Small range | Arthropods | Quadratic | 3 | -38.06 | 82.31 | 0.00 | 0.57 |
| Small range | Arthropods | Linear | 2 | -39.41 | 82.91 | 0.61 | 0.42 |
| Small range | Arthropods | Log-based pseudo-threshold | 2 | -42.68 | 89.45 | 7.15 | 0.02 |
| Small range | Arthropods | Null | 1 | -48.23 | 98.48 | 16.18 | 0.00 |
| Small range | Mollusks | Log-based pseudo-threshold | 2 | -31.24 | 66.57 | 0.00 | 0.62 |
| Small range | Mollusks | Quadratic | 3 | -31.26 | 68.71 | 2.14 | 0.21 |
| Small range | Mollusks | Linear | 2 | -32.50 | 69.10 | 2.53 | 0.17 |
| Small range | Mollusks | Null | 1 | -41.61 | 85.26 | 18.69 | 0.00 |
| Small range | Chordates | Quadratic | 3 | -214.79 | 435.64 | 0.00 | 0.82 |
| Small range | Chordates | Log-based pseudo-threshold | 2 | -217.36 | 438.75 | 3.11 | 0.17 |
| Small range | Chordates | Linear | 2 | -221.75 | 447.53 | 11.89 | 0.00 |
| Small range | Chordates | Null | 1 | -233.38 | 468.77 | 33.13 | 0.00 |
| Genetic/life history limitations | Angiosperms | Quadratic | 3 | -497.69 | 1001.40 | 0.00 | 1.00 |
| Genetic/life history limitations | Angiosperms | Linear | 2 | -504.99 | 1013.99 | 12.59 | 0.00 |
| Genetic/life history limitations | Angiosperms | Log-based pseudo-threshold | 2 | -527.10 | 1058.21 | 56.81 | 0.00 |
| Genetic/life history limitations | Angiosperms | Null | 1 | -605.84 | 1213.69 | 212.29 | 0.00 |
| Genetic/life history limitations | Arthropods | Linear | 2 | -70.09 | 144.27 | 0.00 | 0.49 |
| Genetic/life history limitations | Arthropods | Log-based pseudo-threshold | 2 | -70.66 | 145.42 | 1.15 | 0.27 |
| Genetic/life history limitations | Arthropods | Quadratic | 3 | -69.76 | 145.71 | 1.44 | 0.24 |
| Genetic/life history limitations | Arthropods | Null | 1 | -86.06 | 174.16 | 29.89 | 0.00 |
| Genetic/life history limitations | Mollusks | Log-based pseudo-threshold | 2 | -69.75 | 143.61 | 0.00 | 0.68 |
| Genetic/life history limitations | Mollusks | Quadratic | 3 | -70.07 | 146.35 | 2.74 | 0.17 |
| Genetic/life history limitations | Mollusks | Linear | 2 | -71.32 | 146.74 | 3.13 | 0.14 |
| Genetic/life history limitations | Mollusks | Null | 1 | -82.76 | 167.56 | 23.95 | 0.00 |
| Genetic/life history limitations | Chordates | Quadratic | 3 | -196.20 | 398.47 | 0.00 | 0.77 |
| Genetic/life history limitations | Chordates | Log-based pseudo-threshold | 2 | -198.68 | 401.39 | 2.92 | 0.18 |
| Genetic/life history limitations | Chordates | Linear | 2 | -199.92 | 403.87 | 5.40 | 0.05 |
| Genetic/life history limitations | Chordates | Null | 1 | -228.70 | 459.40 | 60.93 | 0.00 |
