# Supplementary material for: Threats to Neglected Biodiversity: Conservation Success Requires More Than Charisma
Source: Frontiers journal article supplement (doi:10.3389/fcosc.2021.727517), 2022-01-14
Supplement: Data_Sheet_3.docx [file Data_Sheet_3.docx]

Appendix 3. Effect sizes (**Β**), standard error (**se**), and McFadden’s pseudo R2 (**R2**) for top models (Appendix 2). Models for which the null model was the top model are not listed.

|  |  |  | **Intercept** | | **Year** | | **Year2** | |  |
| --- | --- | --- | --- | --- | --- | --- | --- | --- | --- |
| **Threat** | **Phylum** | **Model form** | Β0 | se | Β1 | se | Β2 | se | R2 |
| Aquatic development | Angiosperms | Quadratic | -1.49 | 0.12 | 0.40 | 0.14 | -0.35 | 0.11 | 0.02 |
| Aquatic development | Arthropods | Linear | -0.99 | 0.22 | 0.92 | 0.24 |  |  | 0.12 |
| Aquatic development | Mollusks | Quadratic | 2.58 | 0.42 | 0.57 | 0.25 | -1.08 | 0.30 | 0.21 |
| Aquatic development | Chordates | Quadratic | 0.37 | 0.17 | 0.55 | 0.13 | -0.64 | 0.13 | 0.07 |
| Development | Angiosperms | Quadratic | 0.04 | 0.09 | 0.32 | 0.08 | -0.26 | 0.06 | 0.02 |
| Development | Mollusks | Linear | 0.002 | 0.19 | 0.82 | 0.21 |  |  | 0.10 |
| Development | Chordates | Linear | -0.008 | 0.11 | 0.62 | 0.12 |  |  | 0.06 |
| Mining & oil/gas | Angiosperms | Quadratic | -1.85 | 0.13 | -0.22 | 0.14 | -0.33 | 0.11 | 0.03 |
| Mining & oil/gas | Arthropods | Log-based pseudo-threshold | -6.53 | 2.51 | 1.34 | 0.73 |  |  | 0.06 |
| Mining & oil/gas | Mollusks | Log-based pseudo-threshold | -2.55 | 1.13 | 0.68 | 0.35 |  |  | 0.03 |
| Mining & oil/gas | Chordates | Quadratic | -0.94 | 0.19 | 1.01 | 0.20 | -0.52 | 0.19 | 0.10 |
| Harvested renewable resources | Angiosperms | Log-based pseudo-threshold | -5.14 | 0.52 | 1.72 | 0.17 |  |  | 0.11 |
| Harvested renewable resources | Arthropods | Linear | -0.65 | 0.20 | 0.89 | 0.22 |  |  | 0.12 |
| Harvested renewable resources | Mollusks | Linear | -0.25 | 0.19 | 0.65 | 0.20 |  |  | 0.07 |
| Harvested renewable resources | Chordates | Quadratic | 0.01 | 0.17 | 0.87 | 0.15 | -0.57 | 0.15 | 0.10 |
| Non-developmental habitat alteration | Angiosperms | Quadratic | -0.77 | 0.10 | 0.38 | 0.12 | -0.51 | 0.09 | 0.04 |
| Non-developmental habitat alteration | Arthropods | Linear | -1.42 | 0.24 | 0.73 | 0.25 |  |  | 0.07 |
| Non-developmental habitat alteration | Mollusks | Quadratic | 0.41 | 0.28 | 0.25 | 0.22 | -0.71 | 0.26 | 0.06 |
| Non-developmental habitat alteration | Chordates | Log-based pseudo-threshold | -6.30 | 0.83 | 1.82 | 0.26 |  |  | 0.19 |
| Anthropogenic ecosystem modification | Angiosperms | Quadratic | -4.99 | 0.43 | 1.11 | 0.27 | 0.91 | 0.20 | 0.46 |
| Anthropogenic ecosystem modification | Chordates | Linear | -4.33 | 0.59 | 1.35 | 0.45 |  |  | 0.15 |
| Human disturbances | Angiosperms | Quadratic | 0.67 | 0.09 | 0.34 | 0.08 | -0.49 | 0.07 | 0.05 |
| Human disturbances | Arthropods | Quadratic | 0.18 | 0.26 | 0.05 | 0.21 | -0.65 | 0.23 | 0.06 |
| Human disturbances | Mollusks | Quadratic | -2.07 | 0.38 | 0.33 | 0.20 | 0.65 | 0.22 | 0.08 |
| Human disturbances | Chordates | Linear | -1.38 | 0.14 | 0.55 | 0.13 |  |  | 0.05 |
| Authorized take | Angiosperms | Linear | -2.18 | 0.12 | -0.64 | 0.13 |  |  | 0.05 |
| Authorized take | Chordates | Linear | -1.70 | 0.15 | 0.37 | 0.15 |  |  | 0.02 |
| Unauthorized take | Mollusks | Quadratic | -0.21 | 0.37 | 0.38 | 0.45 | -2.00 | 0.60 | 0.17 |
| Unauthorized take | Chordates | Linear | -1.98 | 0.17 | 0.50 | 0.16 |  |  | 0.04 |
| Unintentional take | Chordates | Linear | -1.67 | 0.16 | 0.88 | 0.15 |  |  | 0.11 |
| Sedimentation | Angiosperms | Quadratic | -0.55 | 0.11 | 1.84 | 0.17 | -0.33 | 0.13 | 0.28 |
| Sedimentation | Arthropods | Linear | -1.54 | 0.28 | 1.32 | 0.30 |  |  | 0.19 |
| Sedimentation | Mollusks | Quadratic | 1.60 | 0.34 | 0.70 | 0.24 | -0.85 | 0.29 | 0.14 |
| Sedimentation | Chordates | Quadratic | -0.50 | 0.18 | 0.84 | 0.17 | -0.54 | 0.17 | 0.08 |
| Pesticide pollution | Angiosperms | Log-based pseudo-threshold | -5.86 | 1.05 | 1.00 | 0.33 |  |  | 0.03 |
| Pesticide pollution | Arthropods | Quadratic | -0.20 | 0.30 | 0.99 | 0.42 | -1.52 | 0.46 | 0.15 |
| Pesticide pollution | Mollusks | Log-based pseudo-threshold | -3.39 | 1.21 | 1.00 | 0.38 |  |  | 0.05 |
| Pesticide pollution | Chordates | Linear | -2.31 | 0.20 | 0.73 | 0.18 |  |  | 0.07 |
| Chemical pollution | Mollusks | Quadratic | 1.44 | 0.35 | 0.66 | 0.27 | -1.23 | 0.35 | 0.15 |
| Chemical pollution | Chordates | Linear | -1.67 | 0.16 | 0.80 | 0.15 |  |  | 0.09 |
| Nutrient pollution | Mollusks | Quadratic | 1.31 | 0.33 | 0.44 | 0.24 | -1.05 | 0.31 | 0.12 |
| Nutrient pollution | Chordates | Linear | -1.88 | 0.17 | 0.68 | 0.16 |  |  | 0.07 |
| Nonpoint pollution | Mollusks | Quadratic | 1.26 | 0.33 | 0.56 | 0.26 | -1.10 | 0.33 | 0.13 |
| Nonpoint pollution | Chordates | Quadratic | -0.84 | 0.19 | 1.20 | 0.24 | -0.86 | 0.22 | 0.11 |
| Object pollution | Arthropods | Quadratic | -0.67 | 0.32 | 0.04 | 0.39 | -1.38 | 0.47 | 0.12 |
| Object pollution | Chordates | Linear | -3.81 | 0.47 | 1.53 | 0.36 |  |  | 0.20 |
| Direct species interactions | Angiosperms | Linear | 1.47 | 0.11 | 1.73 | 0.15 |  |  | 0.23 |
| Direct species interactions | Arthropods | Log-based pseudo-threshold | -6.64 | 1.53 | 2.20 | 0.48 |  |  | 0.22 |
| Direct species interactions | Mollusks | Quadratic | -0.92 | 0.31 | 1.63 | 0.29 | 0.88 | 0.25 | 0.36 |
| Direct species interactions | Chordates | Quadratic | 0.60 | 0.17 | 0.35 | 0.12 | -0.37 | 0.13 | 0.03 |
| Indirect species interactions | Angiosperms | Linear | 0.28 | 0.08 | 1.45 | 0.11 |  |  | 0.22 |
| Indirect species interactions | Arthropods | Quadratic | 1.14 | 0.35 | 2.51 | 0.50 | -1.83 | 0.51 | 0.40 |
| Indirect species interactions | Mollusks | Linear | -1.08 | 0.28 | 1.92 | 0.31 |  |  | 0.37 |
| Indirect species interactions | Chordates | Linear | -0.61 | 0.12 | 0.79 | 0.12 |  |  | 0.10 |
| Severe weather | Angiosperms | Linear | -0.60 | 0.09 | 1.96 | 0.14 |  |  | 0.35 |
| Severe weather | Arthropods | Quadratic | -1.43 | 0.35 | 2.17 | 0.36 | 1.05 | 0.32 | 0.46 |
| Severe weather | Mollusks | Log-based pseudo-threshold | -17.82 | 2.91 | 5.36 | 0.88 |  |  | 0.45 |
| Severe weather | Chordates | Quadratic | -0.67 | 0.19 | 1.53 | 0.22 | -0.42 | 0.19 | 0.22 |
| Fire | Angiosperms | Linear | -1.09 | 0.09 | 1.12 | 0.09 |  |  | 0.18 |
| Fire | Arthropods | Quadratic | -1.01 | 0.38 | 4.08 | 1.12 | -2.31 | 0.83 | 0.36 |
| Fire | Mollusks | Linear | -2.94 | 0.50 | 1.15 | 0.45 |  |  | 0.13 |
| Fire | Chordates | Linear | -2.47 | 0.23 | 0.94 | 0.20 |  |  | 0.11 |
| Climate change | Angiosperms | Linear | -5.62 | 0.72 | 5.26 | 0.53 |  |  | 0.88 |
| Climate change | Arthropods | Quadratic | -4.89 | 1.10 | 4.10 | 0.85 | s | 0.77 | 0.81 |
| Climate change | Chordates | Linear | -3.87 | 0.53 | 3.19 | 0.43 |  |  | 0.54 |
| Few individuals | Angiosperms | Log-based pseudo-threshold | -2.28 | 0.44 | 1.25 | 0.15 |  |  | 0.08 |
| Few individuals | Arthropods | Linear | 0.22 | 0.20 | 0.96 | 0.22 |  |  | 0.14 |
| Few individuals | Mollusks | Linear | 0.84 | 0.22 | 0.92 | 0.24 |  |  | 0.12 |
| Few individuals | Chordates | Linear | -0.29 | 0.12 | 0.76 | 0.12 |  |  | 0.09 |
| Small range | Angiosperms | Quadratic | 1.34 | 0.11 | 1.00 | 0.10 | -0.19 | 0.08 | 0.12 |
| Small range | Arthropods | Linear | 2.51 | 0.40 | 1.29 | 0.36 |  |  | 0.18 |
| Small range | Mollusks | Log-based pseudo-threshold | -3.31 | 1.27 | 1.94 | 0.47 |  |  | 0.25 |
| Small range | Chordates | Quadratic | 0.99 | 0.18 | 0.67 | 0.12 | -0.50 | 0.14 | 0.08 |
| Genetic/life history limitations | Angiosperms | Quadratic | -0.78 | 0.10 | 0.91 | 0.09 | 0.29 | 0.07 | 0.18 |
| Genetic/life history limitations | Arthropods | Linear | -0.55 | 0.21 | 1.19 | 0.24 |  |  | 0.19 |
| Genetic/life history limitations | Mollusks | Log-based pseudo-threshold | -5.46 | 1.47 | 1.92 | 0.47 |  |  | 0.16 |
| Genetic/life history limitations | Chordates | Quadratic | -0.33 | 0.18 | 1.13 | 0.17 | -0.43 | 0.16 | 0.14 |
