# Supplementary material for: Threats to Neglected Biodiversity: Conservation Success Requires More Than Charisma
Source: Frontiers journal article supplement (doi:10.3389/fcosc.2021.727517), 2022-01-14

Appendix 4. Probability (+/- 95% CI) of habitat modification threats impacting angiosperm, arthropod, chordate, and mollusk phyla at the time of their listing. Year of listing was scaled and centered for the models.


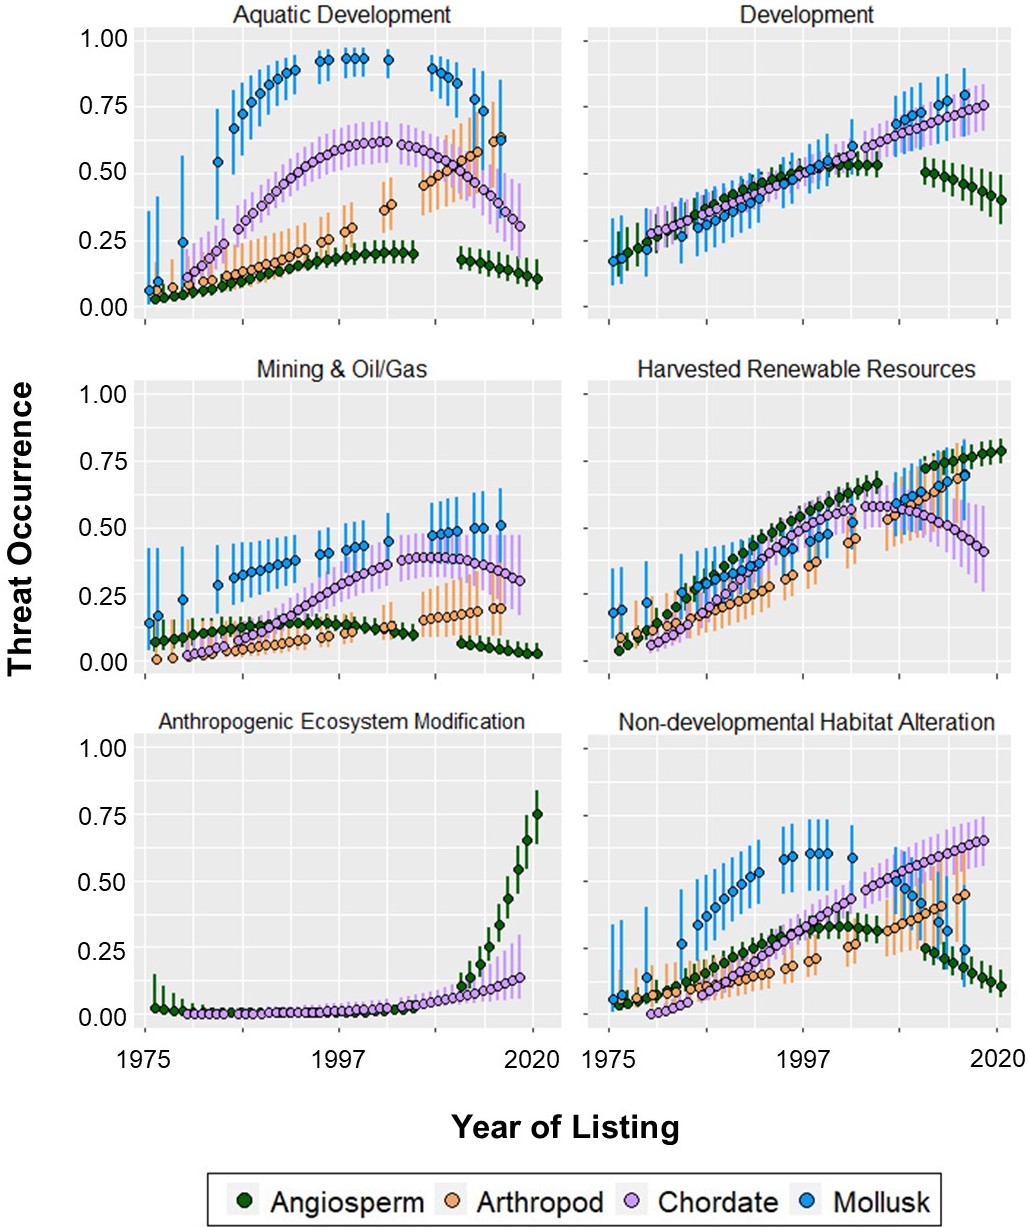

Supplement: Data_Sheet_4.docx [file Data_Sheet_4.docx]
