# Supplementary material for: Threats to Neglected Biodiversity: Conservation Success Requires More Than Charisma
Source: Frontiers journal article supplement (doi:10.3389/fcosc.2021.727517), 2022-01-14
Supplement: Data_Sheet_6.docx [file Data_Sheet_6.docx]

Appendix 6. Probabilities of threats impacting angiosperms. Denoted are the probabilities in their first and most recent years of listing, 1977 and 2017, as well as their minimum and maximum probabilities.

| Threat | Model structure | Probability in first year of listing | Probability in latest year of listing | Year of minimum probability | Minimum probability | Year of maximum probability | Maximum probability |
| --- | --- | --- | --- | --- | --- | --- | --- |
| Aquatic development | Quadratic | 0.03 | 0.11 | 1977 | 0.03 | 2002 | 0.20 |
| Development | Quadratic | 0.18 | 0.40 | 1977 | 0.18 | 2002 | 0.53 |
| Mining & oil/gas | Quadratic | 0.07 | 0.02 | 2017 | 0.02 | 1993 | 0.14 |
| Harvested renewable resources | Pseudo-threshold | 0.04 | 0.79 | 1977 | 0.04 | 2017 | 0.79 |
| Non-developmental habitat alteration | Quadratic | 0.03 | 0.10 | 1977 | 0.03 | 2000 | 0.33 |
| Anthropogenic ecosystem modification | Quadratic | 0.02 | 0.75 | 1990 | 0.01 | 2017 | 0.75 |
| Human disturbances | Quadratic | 0.15 | 0.33 | 1977 | 0.15 | 2000 | 0.67 |
| Authorized take | Linear | 0.28 | 0.03 | 2017 | 0.03 | 1977 | 0.28 |
| Unauthorized take | Null |  |  |  |  |  |  |
| Unintentional take | NA (N < 10) |  |  |  |  |  |  |
| Sedimentation | Quadratic | 0.01 | 0.86 | 1977 | 0.01 | 2017 | 0.86 |
| Pesticide pollution | Pseudo-threshold | 0.01 | 0.11 | 1977 | 0.01 | 2017 | 0.11 |
| Chemical pollution | Null |  |  |  |  |  |  |
| Nutrient pollution | Null |  |  |  |  |  |  |
| Nonpoint pollution | NA (N < 10) |  |  |  |  |  |  |
| Object pollution | Null |  |  |  |  |  |  |
| Direct species interactions | Linear | 0.14 | 0.99 | 1977 | 0.14 | 2017 | 0.99 |
| Indirect species interactions | Linear | 0.08 | 0.96 | 1977 | 0.08 | 2017 | 0.96 |
| Severe weather | Linear | 0.01 | 0.97 | 1977 | 0.01 | 2017 | 0.97 |
| Fire | Linear | 0.04 | 0.77 | 1977 | 0.04 | 2017 | 0.77 |
| Climate change | Linear | 0.00 | 0.99 | 1977 | 0.00 | 2017 | 0.99 |
| Few individuals | Pseudo-threshold | 0.29 | 0.92 | 1977 | 0.29 | 2017 | 0.92 |
| Small range | Quadratic | 0.22 | 0.93 | 1977 | 0.23 | 2017 | 0.93 |
| Genetic/life history limitations | Quadratic | 0.19 | 0.91 | 1980 | 0.18 | 2017 | 0.91 |
