# Supplementary material for: Threats to Neglected Biodiversity: Conservation Success Requires More Than Charisma
Source: Frontiers journal article supplement (doi:10.3389/fcosc.2021.727517), 2022-01-14

Appendix 7. Probability (+/- 95% CI) of overutilization, environmental stochasticity, and demographic stochasticity threats impacting angiosperm, arthropod, chordate, and mollusk phyla at the time of their listing. Year of listing was scaled and centered for the models.


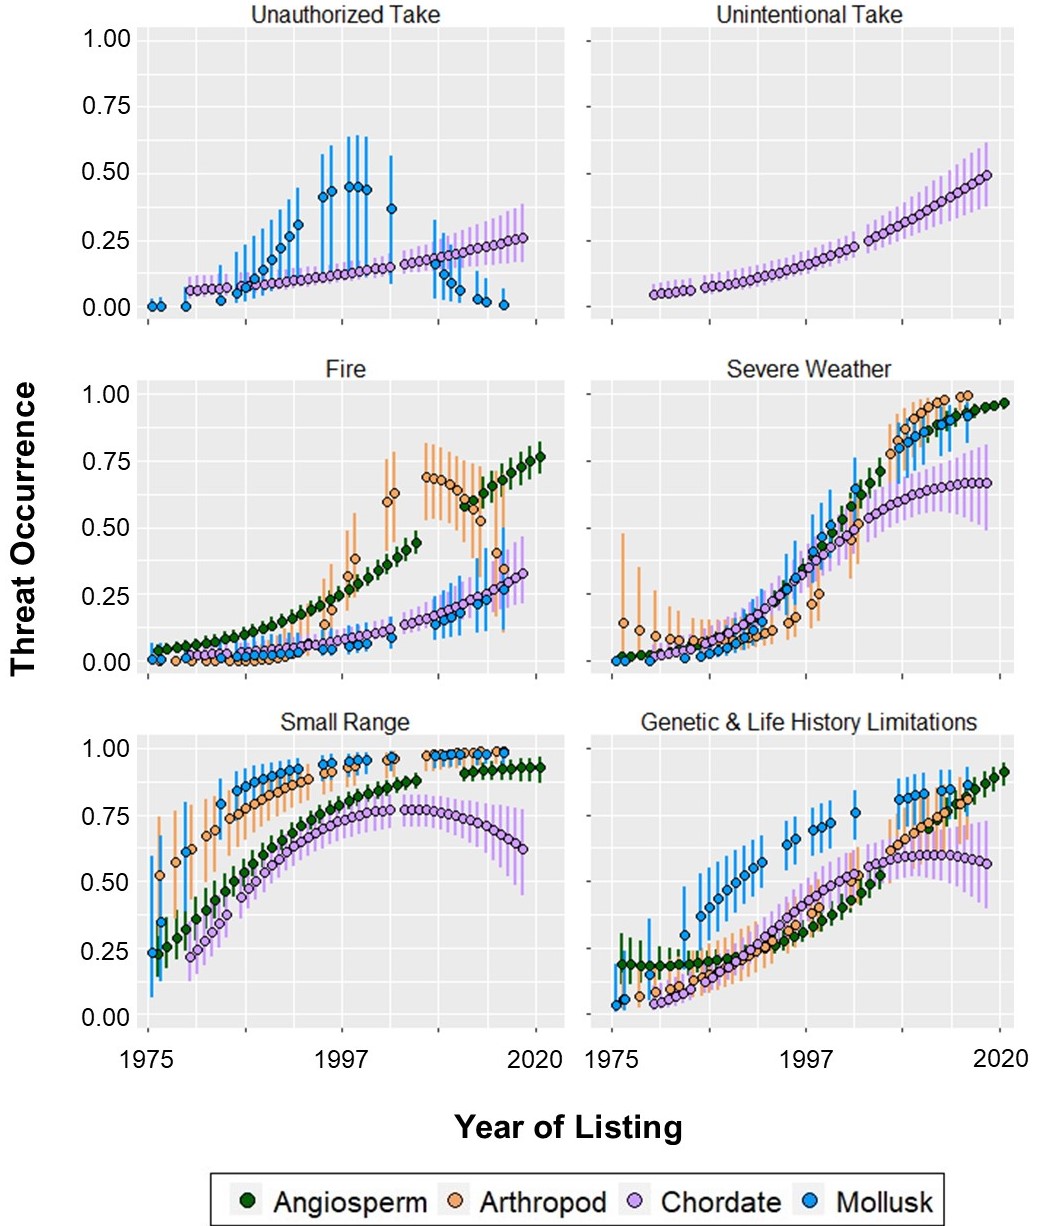

Supplement: Data_Sheet_7.docx [file Data_Sheet_7.docx]
