# Supplementary material for: Threats to Neglected Biodiversity: Conservation Success Requires More Than Charisma
Source: Frontiers journal article supplement (doi:10.3389/fcosc.2021.727517), 2022-01-14
Supplement: Data_Sheet_8.docx [file Data_Sheet_8.docx]

Appendix 8. Probabilities of threats impacting chordates. Denoted are the probabilities in their first and most recent years of listing, 1975 and 2020, as well as their minimum and maximum probabilities.

| Threat | Model structure | Probability in first year of listing | Probability in latest year of listing | Year of minimum probability | Minimum probability | Year of maximum probability | Maximum probability |
| --- | --- | --- | --- | --- | --- | --- | --- |
| Aquatic development | Quadratic | 0.11 | 0.30 | 1975 | 0.11 | 2001 | 0.62 |
| Development | Linear | 0.27 | 0.76 | 1975 | 0.27 | 2020 | 0.76 |
| Mining & oil/gas | Quadratic | 0.02 | 0.30 | 1975 | 0.02 | 2008 | 0.39 |
| Harvested renewable resources | Quadratic | 0.06 | 0.41 | 1975 | 0.06 | 2006 | 0.58 |
| Non-developmental habitat alteration | Pseudo-threshold | 0.00 | 0.66 | 1975 | 0.00 | 2020 | 0.66 |
| Anthropogenic ecosystem modification | Linear | 0.00 | 0.14 | 1975 | 0.00 | 2020 | 0.14 |
| Human disturbances | Linear | 0.10 | 0.41 | 1975 | 0.10 | 2020 | 0.41 |
| Authorized take | Linear | 0.09 | 0.27 | 1975 | 0.09 | 2020 | 0.27 |
| Unauthorized take | Linear | 0.06 | 0.26 | 1975 | 0.06 | 2020 | 0.26 |
| Unintentional take | Linear | 0.05 | 0.49 | 1975 | 0.05 | 2020 | 0.49 |
| Sedimentation | Quadratic | 0.04 | 0.31 | 1975 | 0.04 | 2006 | 0.46 |
| Pesticide pollution | Linear | 0.03 | 0.28 | 1975 | 0.03 | 2020 | 0.28 |
| Chemical pollution | Linear | 0.05 | 0.45 | 1975 | 0.05 | 2020 | 0.45 |
| Nutrient pollution | Linear | 0.05 | 0.35 | 1975 | 0.05 | 2020 | 0.35 |
| Nonpoint pollution | Quadratic | 0.01 | 0.17 | 1975 | 0.01 | 2005 | 0.40 |
| Object pollution | Linear | 0.00 | 0.28 | 1975 | 0.00 | 2020 | 0.28 |
| Direct species interactions | Quadratic | 0.30 | 0.49 | 1975 | 0.30 | 2002 | 0.67 |
| Indirect species interactions | Linear | 0.14 | 0.70 | 1975 | 0.14 | 2020 | 0.70 |
| Severe weather | Quadratic | 0.02 | 0.67 | 1975 | 0.02 | 2020 | 0.67 |
| Fire | Linear | 0.02 | 0.33 | 1975 | 0.02 | 2020 | 0.33 |
| Climate change | Linear | 0.00 | 0.89 | 1975 | 0.00 | 2020 | 0.89 |
| Few individuals | Linear | 0.19 | 0.75 | 1975 | 0.19 | 2020 | 0.75 |
| Small range | Quadratic | 0.22 | 0.62 | 1975 | 0.22 | 2004 | 0.77 |
| Genetic/life history limitations | Quadratic | 0.04 | 0.57 | 1975 | 0.04 | 2013 | 0.60 |
